# Supplementary material
Source: PubMed Central journal article supplement (PMC3094144)
Supplement: supp_00499.2010_suppdata.pdf [file supp_00499.2010_suppdata.pdf]

1 **Supplementary Data:**

2  
3 Table ST1. Primers used for qPCR analysis

4

---

5

| 6 Gene name       | 7 Direction | 8 Sequence 5' ----- 3'                | 9 Accession No. |
|-------------------|-------------|---------------------------------------|-----------------|
| 10 hBSEP          | 11 Forward  | 12 aca tgc ttg cga gga cct tta        | 13 NM003472     |
|                   | 14 Reverse  | 15 gga ggt tcg tgc acc agg ta         |                 |
| 16 hNTCP          | 17 Forward  | 18 ctc aaa tcc aaa cgg cca caa tac    | 19 NM003049     |
|                   | 20 Reverse  | 21 cac act gca caa aga gaa tga tga tc |                 |
| 22 hMLL3          | 23 Forward  | 24 gaa aat gac aca atg tcg aat gc     | 25 NM170606     |
|                   | 26 Reverse  | 27 ttc acc cag agc ctc ctc tt         |                 |
| 28 hMLL4(ALR)     | 29 Forward  | 30 gca aat cgc tag cat cat tca g      | 31 NM014727     |
|                   | 32 Reverse  | 33 ggc act atg aa gtc agc cat ct      |                 |
| 34 mMLL4          | 35 Forward  | 36 ttg ccc caa tgt cta cca ttt t      | 37 BC058659     |
|                   | 38 Reverse  | 39 gca tgg tct tgt cct tga aga ac     |                 |
| 40 hNCOA6         | 41 Forward  | 42 tgg tct gga aga ggc tga tca        | 43 NM014071     |
|                   | 44 Reverse  | 45 tta ggg cct gag tta tcc aag tta a  |                 |
| 46 mNCOA6         | 47 Forward  | 48 ccc acc agt gta cgc tca ata g      | 49 NM019825     |
|                   | 50 Reverse  | 51 ttg gcg ctg tgg aga tga            |                 |
| 52 mTNF- $\alpha$ | 53 Forward  | 54 agg ctg ccc cga cta cgt            | 55 NM013693     |
|                   | 56 Reverse  | 57 atg ggc tca tac cag ggt ttg        |                 |
| 58 mL-6           | 59 Forward  | 60 tgg gac tga tgc tgg tga ca         | 61 BC132458     |
|                   | 62 Reverse  | 63 ttt cca cga ttt ccc aga gaa        |                 |

---

64  
65  
66  
67  
68  
69  
70  
71  
72  
73  
74  
75

46 Table ST2. Primers used in ChIP analysis

47  
48  
49  
50  
51  
52  
53  
54  
55  
56  
57  
58  
59  
60  
61  
62  
63  
64  
65  
66  
67  
68  
69  
70  
71  
72  
73  
74  
75  
76  
77  
78

---

| Gene name | Direction | Sequence 5' ---- 3'                |
|-----------|-----------|------------------------------------|
| mBsep     | Forward   | ggt ccc cac gca ctc tgg gtt        |
|           | Reverse   | gtc ctc ttc cgc tca gac gcc act g  |
| mMrp2     | Forward   | cca ctt agc act act gct gaa tt     |
|           | Reverse   | gtg cca cca ccg cct ggc            |
| hBSEP     | Forward   | ggg ttt ccc aag cac act ctg tgt tt |
|           | Reverse   | gag gaa gcc aga gga aat ggt gg     |
| hNTCP     | Forward   | ggc gac agc cag aga aat agc tca    |
|           | Reverse   | gtg gca ggg tga agt tga at         |

---

79 Table ST3 Sequences of siRNAs used in this study

| 80  | Gene name   | Source-Catalog No     | Sequence                  |
|-----|-------------|-----------------------|---------------------------|
| 81  |             |                       | (Sense strand - 5' to 3') |
| 82  | <hr/>       |                       |                           |
| 83  | NCOA6       | sc-61401 – Santa Cruz | Pool of 3 siRNAs          |
| 84  | 61401-A     |                       | CUCCGAACAUGCAAGGAAAtt     |
| 85  | 61401-B     |                       | GGAAGCACCAACAUCGUUAtt     |
| 86  | 61401-C     |                       | GUUGCGAGUUGAAGUUCAAtt     |
| 87  |             |                       |                           |
| 88  | MLL3        | sc-62623 – Santa Cruz | Pool of 3 siRNAs          |
| 89  |             |                       |                           |
| 90  | 62623-A     |                       | CAAGGCUACUCAACCUUGAtt     |
| 91  | 62623-B     |                       | GAACGCACCUUUAUAGUAAAtt    |
| 92  | 62623-C     |                       | CCAUUCGUGUGCACCUAUAtt     |
| 93  |             |                       |                           |
| 94  | MLL4        | D-009670- Dharmacon   | Pool of 4 siRNAs          |
| 95  | D-009670-01 |                       | UAAGGAGGAUUGUGAUUUUA      |
| 96  | D-009670-02 |                       | GAAGAAAGAAGAAGAAGAA       |
| 97  | D-009670-03 |                       | GCACCCAGCUAUAUGAGAA       |
| 98  | D-009670-04 |                       | CAGCGACCCUCCUAUGAUA       |
| 99  |             |                       |                           |
| 100 | <hr/>       |                       |                           |
| 101 |             |                       |                           |

102

103

104 Fig. S1. Serum Bile acid analysis in sham-operated and bile duct-ligated (CBDL)

105 mice at 1, 3 and 7 days post-ligation.

106 In order to verify the patency of bile duct ligation, blood from sham and CBDL

107 mice was collected by heart puncture at the time of sacrifice. Serum was

108 separated after clotting by centrifugation and total 3-hydroxy bile acids were

109 estimated using a kit from Trinity Biotech, NJ, following instructions from

110 manufacturer. As seen from the Figure below, serum bile acids (in  $\mu\text{M}$ ) were

111 significantly increased following CBDL surgery at 1 day (sham  $60.8 \pm 1.2$  vs  
112 CBDL  $674.8 \pm 26.8$ ), 3 days (sham  $204.4 \pm 3$  vs CBDL  $984.7 \pm 50.3$ ) and 7 days  
113 (sham  $87.9 \pm 5.35$  vs CBDL  $1052.9 \pm 20.4$ ) suggesting that CBDL mice were  
114 indeed cholestatic.

115  
116  
117  
118  
119  
120  
121  
122  
123  
124  
125  
126  
127  
128  
129  
130  
131  
132

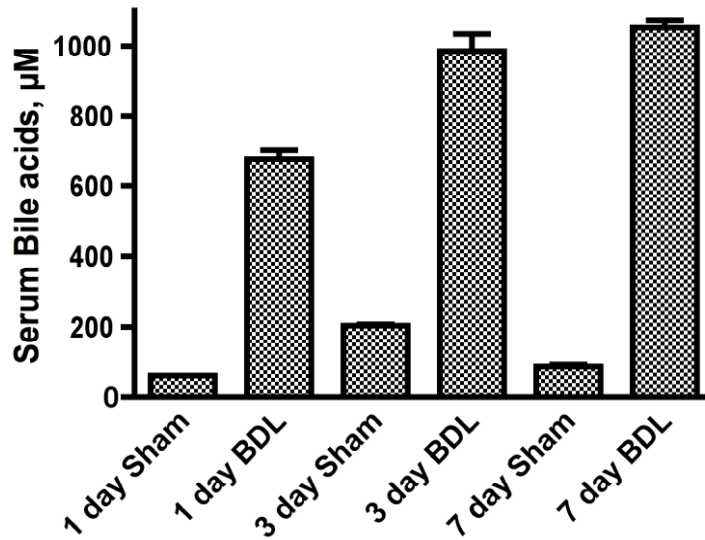

133 Fig. S1. Serum Bile acids in sham-operated and CBDL mice 1, 3 and 7 days post  
134 surgery

135  
136 Fig. S2. Custom RT<sup>2</sup> Profiler Array analysis of RNA from sham-operated and  
137 common bile duct-ligated (CBDL) mice at 1 and 3 days post-BDL.

138 An unbiased array containing oligonucleotide primers corresponding to 84 mouse  
139 genes encoding a) histone lysine acetylation/deacetylation, b) lysine/arginine  
140 methylation/demethylation c) coactivators d) corepressor and nuclear receptors  
141 was custom-made and plated by SA Bioscience Corporation, Rockville, MD. The  
142 array also contained oligos for positive controls (beta-actin, glyceraldehydes 3-  
143 phosphate dehydrogenase (GAPDH), heat shock protein 90 kDa, Acidic

144 ribosomal phosphoprotein (36B4) and positive PCR control in addition to  
 145 negative controls (mouse genomic DNA) to detect contamination, and reverse  
 146 transcription control. qPCR was conducted using RT<sup>2</sup>Profiler PCR Array System  
 147 reagents from SA Biosciences Corporation, Frederick, MD using an ABI 7900HT  
 148 machine. C<sup>T</sup> values were obtained using ABI Software SDS Version 2.1. An  
 149 example of the layout of the 96 well format of the genes is given below.

150  
 151 Fig. S2. Layout of the 96 well format of the custom array. Names of the individual  
 152 genes correspond to gene symbols or aliases in the NCBI database

|             |               |               |                 |              |                   |            |             |            |               |             |              |
|-------------|---------------|---------------|-----------------|--------------|-------------------|------------|-------------|------------|---------------|-------------|--------------|
| Hat1        | Cebp $\gamma$ | Cebp $\alpha$ | Cebp $\epsilon$ | Ep300        | PCAF              | GCN5I2     | Myst2       | Myst1      | Myst3         | NCoA1       | NCoA2        |
| NCoA3       | NCoA4         | NCoA5         | HDAC1           | HDAC2        | HDAC3             | HDAC4      | HDAC5       | HDAC6      | HDAC7a        | HDAC10      | HDAC11       |
| SIRT1       | SIRT2         | SIRT3         | SIRT5           | SIRT6        | SIRT7             | ChD1       | ChD2        | ChD3       | ChD4          | ChD6        | ChD7         |
| ChD8        | Trim28        | Utx           | PGC1 $\alpha$   | PGC1 $\beta$ | NCoR1             | NCoR2      | NR0b2       | NR1h4      | HNF4 $\alpha$ | IL4i        | RXR $\alpha$ |
| RXR $\beta$ | RAR $\alpha$  | ROR $\gamma$  | NR1i3           | NR1i2        | Fbx11             | Jmcd2a     | Jmcd2b      | Jmcd2c     | PRMT1         | PRMT2       | PRMT3        |
| CARM1       | PRMT5         | PRMT7         | Ehmt2           | Ehmt1        | Suv39h1           | MLL1       | MLL3        | MLL5       | SETd1a        | SETd7       | SETd8        |
| Suv420h1    | Suv420h2      | Ezh2          | ASH1L           | ASH2L        | TR $\alpha$       | TR $\beta$ | NR3c1       | PPARBP     | NR1h3         | ER $\alpha$ | NR1h2        |
| AhR         | NR5A2         | MED4          | Gus $\beta$     | HPRT1        | Hsp90 $\alpha$ B1 | GAPDH      | Act $\beta$ | ARBP(36B4) | MGDC          | RTC         |              |

153

154 **Functional Classes of Individual Genes analyzed in the Custom Array (Fig.**  
 155 **S2):**

156 *a) Transcription factors including Nuclear receptors, Coactivators and*

157 *Corepressors:*

158 Cepbg, Cebp $\alpha$ , Ncoa1, Ncoa1,Ncoa3,Ncoa4, Ncoa5, Ncor1, Ncor2, Nrob2,

159 Nr1h4, Hnf4a, Rxra, Rxrb, Rara, Rorc, Nr1i3, Nr1i2, Thra, Thrb, Nr3c1, Pparbp,

160 Nr1h3, Esr, Nr1h2, Ahr, Nr5a2.

161 *B) Histone modifying enzymes ( lysine acetylases and deacetylases, lysine*  
 162 *methylases and demethylases, arginine methylases and demethylases):*  
 163 Ep300, Pcaf, Gcn5l2, Myst2, Myst3, Hdac1, Hdac2, Hdac3, Hdac4Hdac5,  
 164 Hdac6, Hdac7a, Hdac10, Hdac11, Sirt1, Sirt2, Sirt5, Sirt6, Sirt7, Il4i1, Fbxl11,  
 165 Jmjd2a, Jmjd2b, Jmjd2c, Prmt1, Prmt2, Prmt3, Carm1, Prmt5, Prmt7, Ehmt1,  
 166 Ehmt2, Suv39h1, Mll1, Mll3, Mll5, Setd1a, Setd7, Setd8, Suv420h1, Suv420h2,  
 167 Ezh2, Ash1l, Ash2l, Med4  
 168 *c) DNA structure modification enzymes:*  
 169 Chd1, Chd2, Chd3, Chd4, Chd6, Chd7, Chd8.  
 170 *d) Controls:*  
 171 Gusb, Hprt1, Hsp90ab1, Gapdh, Actb, Arbp.. MGDC, RTC, PPC.

172

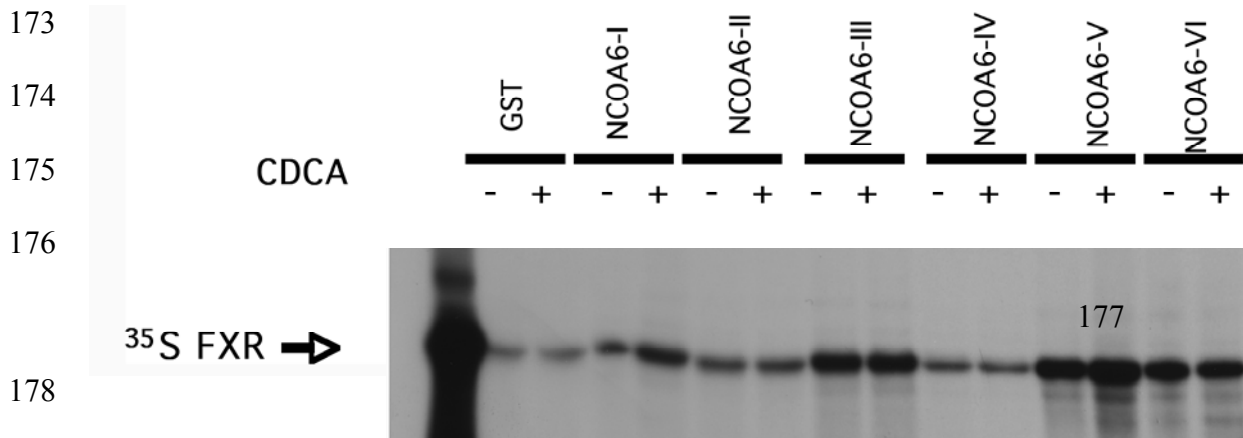

180 Fig.S3. Longer exposure of the audiogram showing stronger interaction of  
 181 domains III and V of NCOA6 with <sup>35</sup>S FXR employing a GST-pulldown assay.  
 182 Details of the methods are found Materials and Methods.

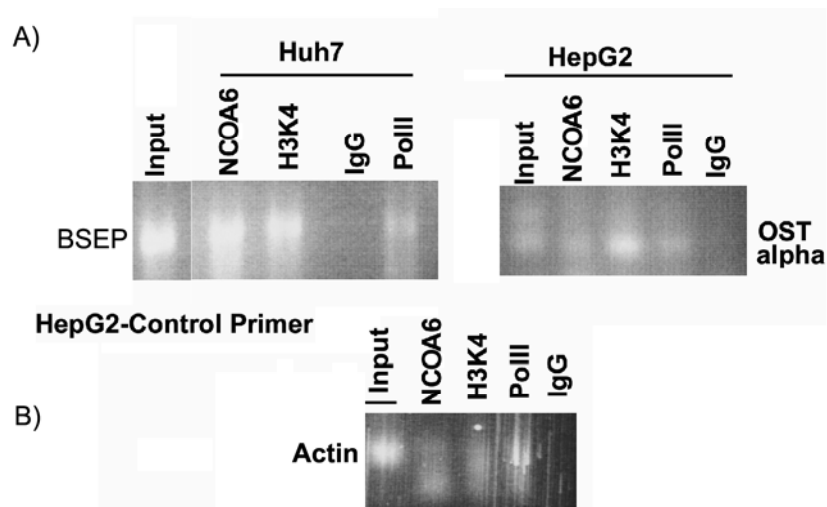

183

184 Fig.S4. A) ChIP analysis of BSEP and OST- $\alpha$  FXRE loci in HepG2 cells in the  
 185 presence of ligand for recruitment of NCOA6, PolIII and H3K4 methylation. B)  
 186 ChIP analysis of a control Actin promoter shows that the recruitment of NCOA6 is  
 187 specific to BSEP promoter.

188

189 **Supplementary Methods:**

190

191 *Preparation and analysis of customized epigenetic array:* A customized RT<sup>2</sup>

192 Profiler array was used to monitor the changes in expression of nuclear

193 receptors, histone modifying enzymes, coactivators and corepressors after

194 CBDL. This array was created in a 96-well format by design and synthesis of

195 primers corresponding to 87 mouse genes for the above families of proteins

196 along with positive and negative controls by Super Array Biosciences, Frederick,

197 MD. A layout of the 96 well plate indicating the genes represented is shown in

198 the Supplement section. Total RNA was prepared from livers of sham-operated

199 and bile duct-ligated mice and reverse transcribed using RT<sup>2</sup> First Strand kit

200 (Super Array BioSciences, MD) according to instructions supplied with the kit.

201 Real time PCR analysis of the expression of the genes corresponding to the

202 epigenetic regulators was carried out on 384-well plates (4 samples/plate) using

203 ABI 7900 HT System (ABI, CA) at the Mount Sinai Core facility. Relative  
204 expression levels in bile duct-ligated samples compared to controls were  
205 computed using the  $\Delta\Delta C_t$  method. For this purpose  $C_t$  values from the plates  
206 were loaded onto Excel-based PCR Array Data Analysis template using the web  
207 portal <http://www.superarray.com/pcrarraydataanalysis.php> following instructions  
208 at this web site.

209 *Real time PCR analysis:* qPCR analysis of message levels for BSEP, NTCP,  
210 NCOA6, MLL3 and MLL4 were conducted as follows. Briefly, total RNA was  
211 prepared from cells or liver tissue using Trizol reagent (Invitrogen, CA) according  
212 to manufacturer's instructions. To remove genomic DNA, the RNA was digested  
213 using RNAase-free DNAase using instructions and reagents from Qiagen  
214 RNAeasy kit (Qiagen, CA). 5  $\mu$ g of total RNA was used for reverse transcription  
215 in a total volume of 21  $\mu$ l using 1<sup>st</sup> strand Synthesis kit from Invitrogen according  
216 to instructions from the manufacturer. cDNA was diluted 10-fold and used at a  
217 concentration of 38 ng/ well in triplicate for qPCR analysis. qPCR was conducted  
218 using Quantitect SYBR Green kit in a Bio Rad Mini Opticon 3 (BioRad, CA) or  
219 Step One Plus Real time PCR system (ABI, CA). qPCR analysis of 36B4 or  
220 cyclophilin (as a control for MLL4) message was used for normalization. Primers  
221 were designed using Primer Express analysis software (ABI, CA) and  
222 dissociation curves after each set of primer use was checked to verify that a  
223 single PCR amplicon was obtained and no primer-dimers were formed. PCR  
224 products were also run on agarose gels to further check the amplicon size. List of  
225 primers used in real time PCR are provided in Table ST1 (supplement).



226 Quantitation of message levels were achieved by the relative quantitation method  
227 expressed as fold change compared to untreated/control siRNA-treated samples  
228 according to ABI Reference Manual.

229 *Western Blot analysis:* Western blot analysis of NCOA6, MLL3 and MLL4 protein  
230 levels were examined after siRNA treatments to verify that cognate protein  
231 levels were reduced after the treatment. For this purpose, cell lysates prepared  
232 as described above in the siRNA treatment section were run (50 µg protein/lane)  
233 on 7.5% SDS-PAGE gels and were transferred to PVDF membranes following  
234 standard protocols. After blocking with 5% nonfat milk-containing buffer for 2 hrs  
235 at room temp., primary antibodies against NCOA6 (1:2000) , MLL3 (1:1000) and  
236 MLL4 (1.2000) in blocking buffer were added and incubated overnight at 4<sup>0</sup>C.  
237 Following 4 x 15 min washes, the blots were incubated with anti-  
238 rabbit/mouse/goat secondary antibodies conjugated to horseradish peroxidase  
239 (1:2000) for 1 hr at room temp. The blots were washed as before and incubated  
240 with peroxidase substrate (Femto, Pierce) and exposed to X-ray films for various  
241 periods until a suitable image was obtained. The same blots were stripped and  
242 reprobed with an antibody to β-actin and actin signals were used to normalize  
243 differences in protein levels in the different samples. The blots were scanned in a  
244 Fuji LAS3000 scanner and the bands were quantified using NIH Image J.

245

246
